# Supplementary material
Source: publisher site journal article supplement (https://static.cambridge.org/content/id/urn:cambridge.org:id:article:S0090599219000722/resource/name/S0090599219000722supp001.docx)
Supplement: Supplementary file 1 [file S0090599219000722supp001.docx]

**Appendix 1: Summary Statistics of the Variables Included in the Analysis**

|  | **Mean** | **Std dev** | **Min** | **Max** | **N** |
| --- | --- | --- | --- | --- | --- |
| Intention to return | 2.21 | 2.95 | 0 | 10 | 1765 |
| Emotional attachment | 3.93 | 1.12 | 1 | 5 | 1798 |
| Media consumption | 7.36 | 3.42 | 2 | 12 | 1821 |
| Connection with friends in homeland | 3.93 | 0.99 | 1 | 5 | 1836 |
| Regular visits to Romania | 2.14 | 0.90 | 1 | 5 | 1835 |
| Remittances | 0.67 | 0.47 | 0 | 1 | 1823 |
| Voting in national elections | 2.74 | 1.68 | 1 | 5 | 1823 |
| Age | 1979 | 11 | 1937 | 1999 | 1785 |
